# Supplementary figures and images for: PARK7/DJ-1 deficiency impairs microglial activation in response to LPS-induced inflammation
Source: Research Square preprint supplement (doi:10.21203/rs.3.rs-3931138/v1), 2024-02-09

# Supplementary Figure 1

**A**

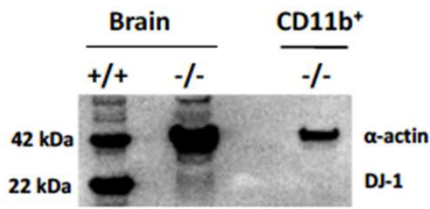

**B**

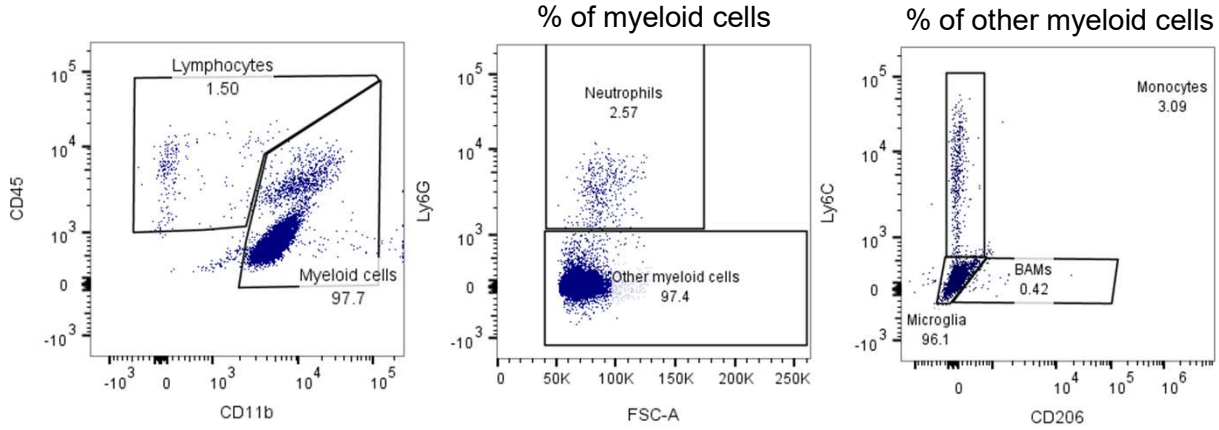

**C**

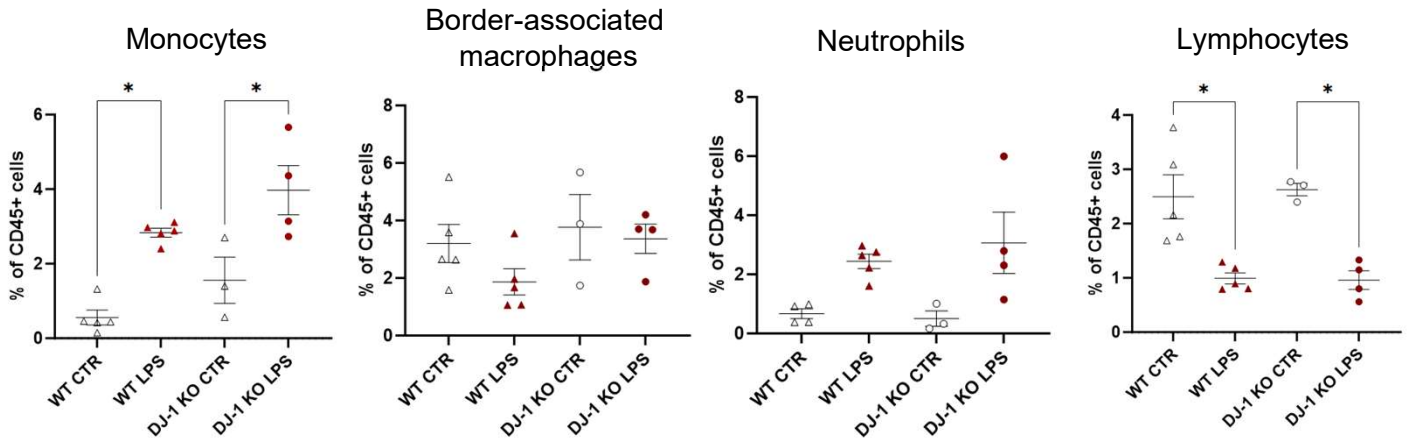

**D**

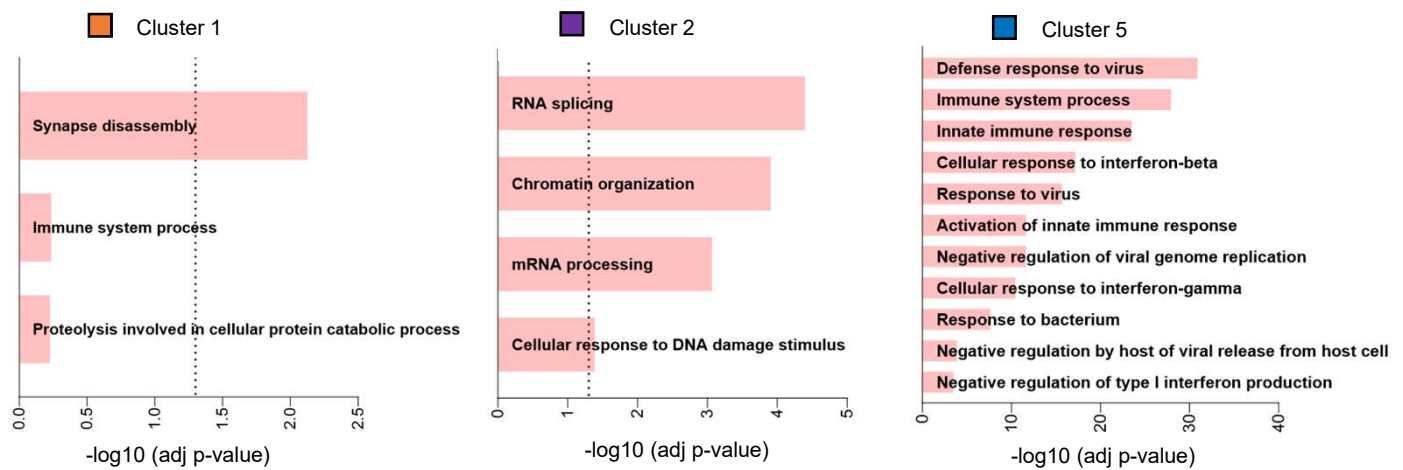

# Supplementary Figure 2

**A**

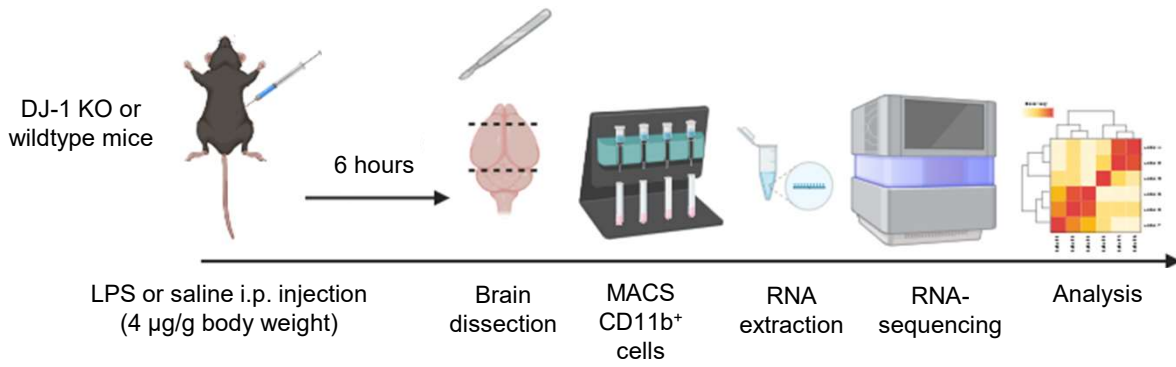

**B**

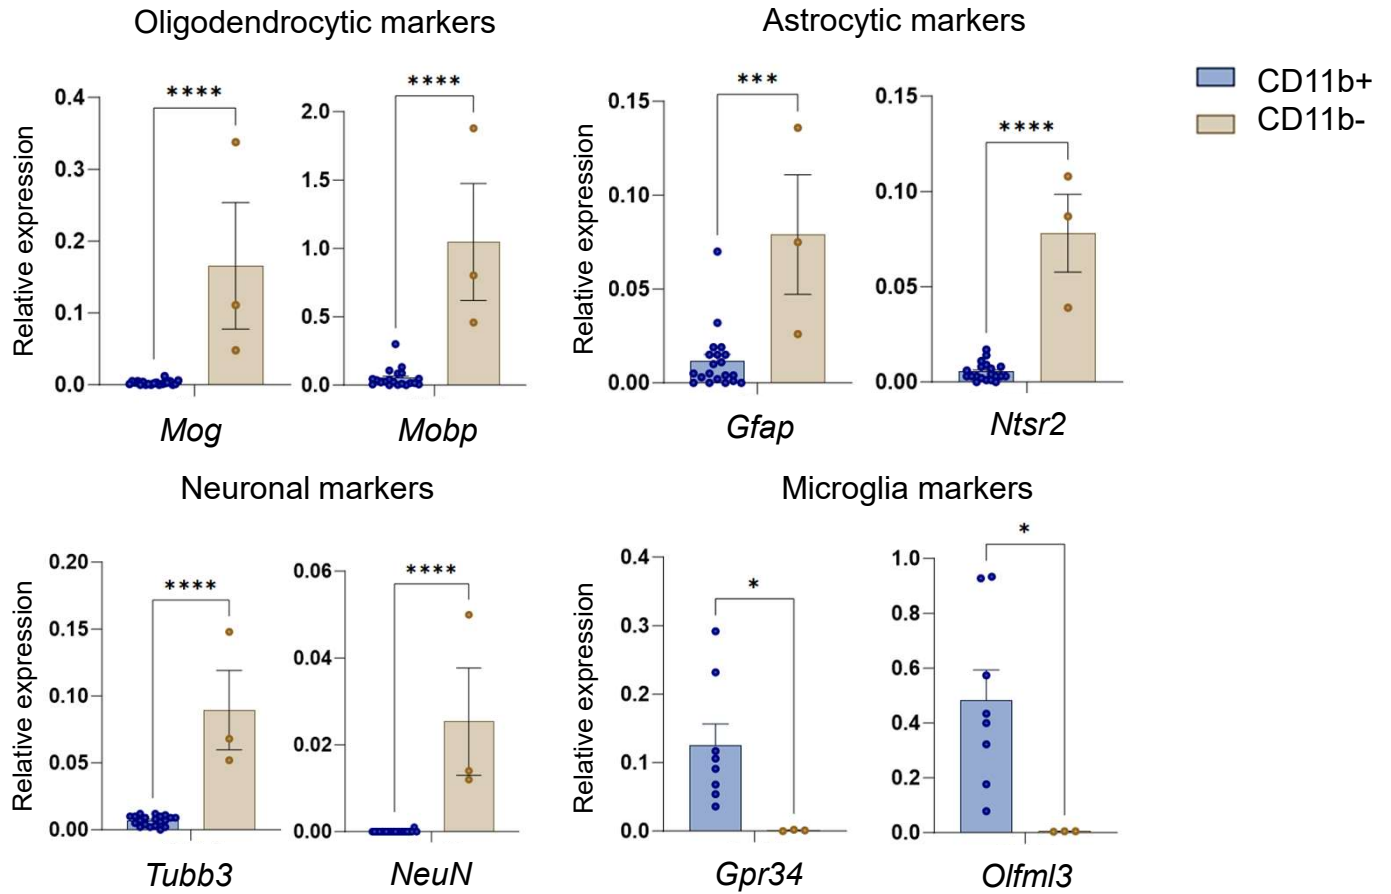

**C**

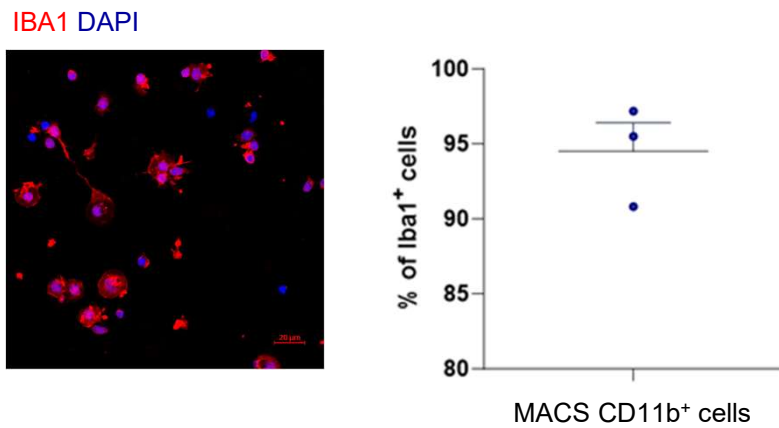

**D**

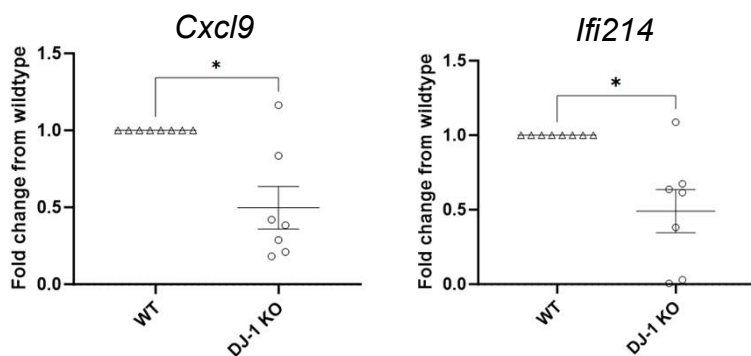

# Supplementary Figure 3

**A**

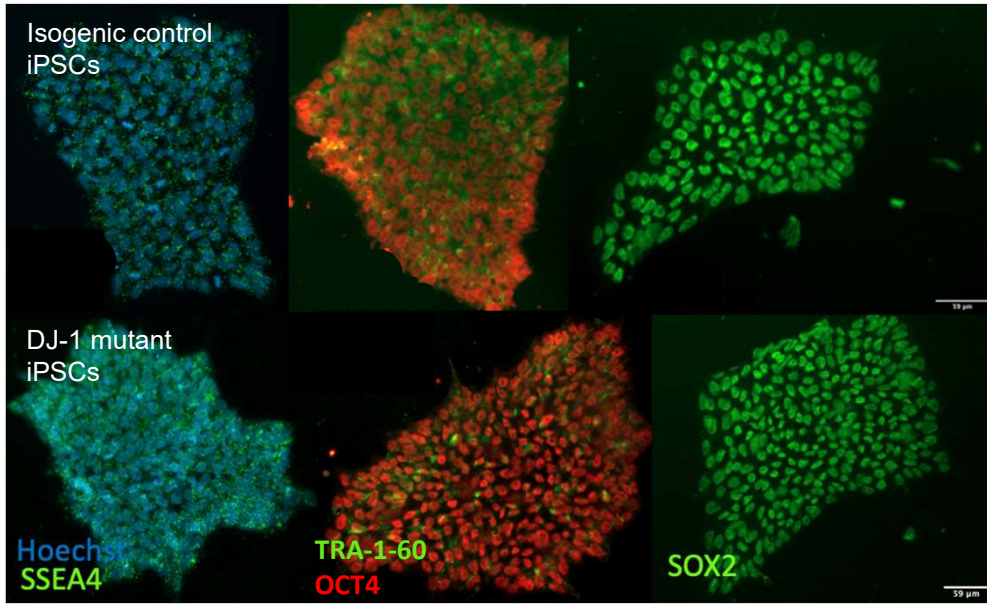

**B**

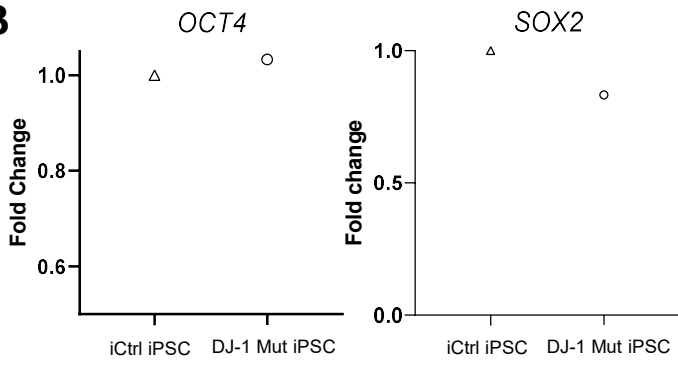

**C**

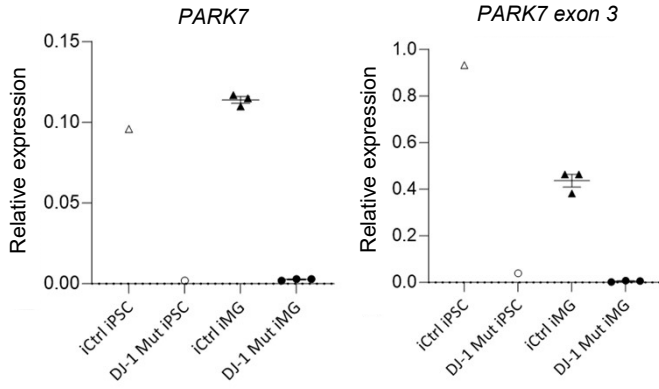

**D**

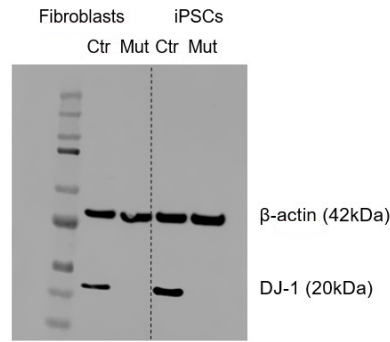

**E**

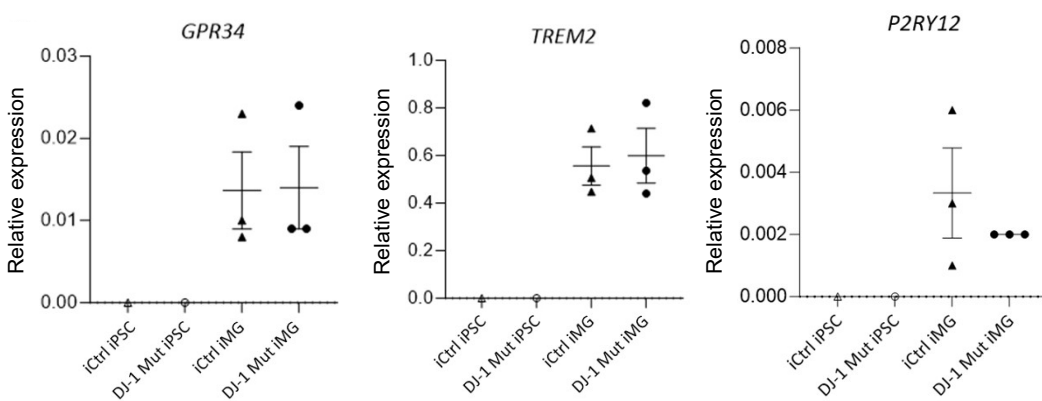

**F**

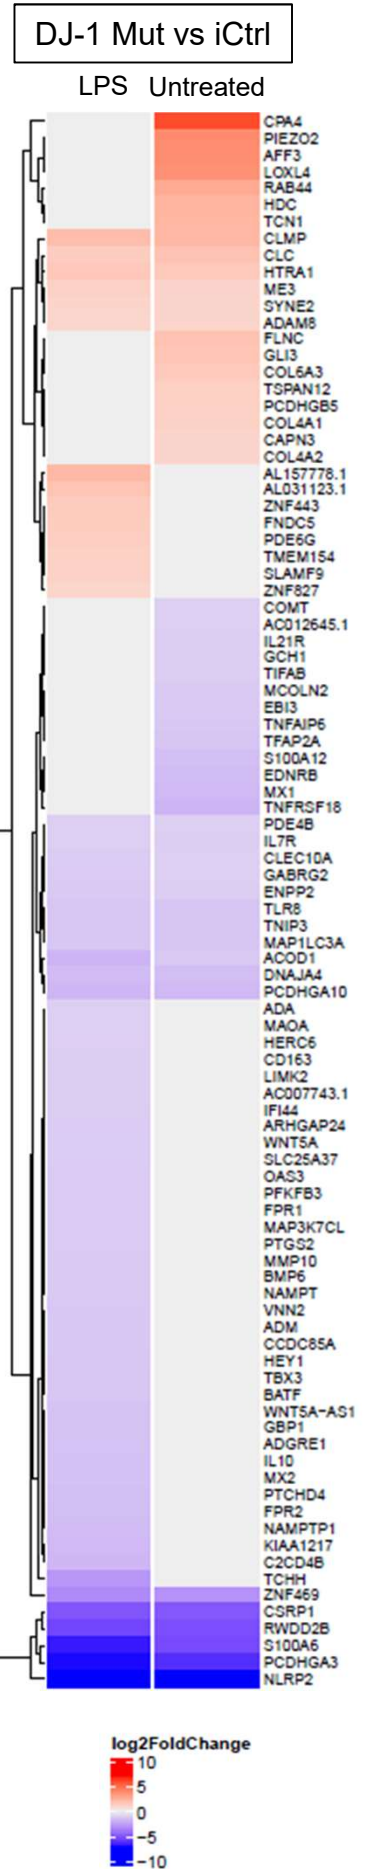

Supplement: Supplementary file 1 [file 3db6fc5c319f39a01f047b5c.pdf]
